# Reciprocity and interaction effectiveness in generalised mutualisms among free-living species

Elena Quintero<sup>1</sup>, Francisco Rodríguez-Sánchez<sup>1,2\*</sup>, Pedro Jordano<sup>1,2\*</sup>

<sup>1</sup> *Integrative Ecology Group, Estación Biológica de Doñana, EBD-CSIC, Av. Américo Vespucio 26, E-41092 Sevilla, Spain*

<sup>2</sup> *Departamento de Biología Vegetal y Ecología, Universidad de Sevilla, Av. Reina Mercedes, E-41012 Sevilla, Spain*

Running title: Reciprocity and effectiveness of mutualisms

Article type: Letter

Number of words Abstract: 148

Number of words main text: 5525

Number of references: 69

Number of figures: 5

## *Authors' contact details:*

Elena Quintero: [equintero@ebd.csic.es](mailto:equintero@ebd.csic.es), +34 954232340 (corresponding author)

Francisco Rodríguez-Sánchez: [frodriguez.work@gmail.com](mailto:frodriguez.work@gmail.com)

Pedro Jordano: [jordano@ebd.csic.es](mailto:jordano@ebd.csic.es)

## Author contributions (CRediT author statement):

EQ: Conceptualization, Methodology, Field and Laboratory work, Data curation, Analysis,

Writing-Original draft preparation, Writing-Reviewing and Editing, Visualization, Project administration.

FRS: Conceptualization, Methodology, Data curation, Analysis, Validation, Supervision, Visualization, Writing-Original draft preparation, Writing-Reviewing and Editing.

PJ: Conceptualization, Methodology, Data curation, Supervision, Project administration, Funding acquisition, Visualization, Writing-Original draft preparation, Writing-Reviewing and Editing.

\*Both FRS and PJ are senior authors.

## *Data availability statement*

The data and code generated for this study are available in [https://github.com/PJordano-Lab/MS\\_effectiveness](https://github.com/PJordano-Lab/MS_effectiveness) and will be archived in a public repository before final publication.

**Keywords:** seed dispersal effectiveness, resource provisioning effectiveness, plant-animal interactions, seed dispersal, Mediterranean, frugivory, regeneration, Bayesian, ecological networks, mutualism

## 40 ABSTRACT

42 Mutualistic interactions among free-living species generally involve weak links and highly  
44 asymmetric dependence among partners, yet our understanding of factors beyond their  
46 emergence is still limited. Using individual-based interactions of a super-generalist fleshy-  
48 fruited plant with its frugivore assemblage we estimate the Resource Provisioning  
Effectiveness (RPE) and Seed Dispersal Effectiveness (SDE) to assess the balance in the  
exchange of resources. Plants were highly dependent on a few super-generalist frugivore  
species, while these interacted with most individual plants, resulting in strong asymmetries in  
mutual dependence. Both RPE and SDE were mainly driven by interaction frequency.  
Despite highly asymmetric dependences, the strong reliance on quantity largely determined  
high reciprocity in rewards between partners (i.e., higher energy provided, more seedlings  
recruited), not obscured by minor variations in the quality of animal or plant service. We  
anticipate reciprocity will emerge in low-intimacy mutualisms where the mutualistic outcome  
largely relies upon interaction frequency.

54

## INTRODUCTION

56 Mutualisms are ecological interactions entailing beneficial outcomes for the interacting  
partners. These outcomes broadly emerge from the exchanges and “fair two-way transfer of  
58 resources” resulting from the interspecific encounters (Kiers et al. 2011). Despite recent  
interest in interspecific exchanges, especially focusing on strict and intimate interactions  
60 (Guimarães *et al.* 2007), much of the reciprocal effect between generalised, free-living,  
mutualistic partners remains unexplored (Thompson 2009).

62

Species-level analyses of complex interaction networks have revealed a highly  
64 heterogeneous structure (i.e., high variance in number of interactions per species), weak  
levels of mutual dependence, and high asymmetry in interaction strength (i.e., marked  
66 difference in partners’ dependencies for any pairwise interaction; Jordano 1987; Johnstone  
& Bshary 2008; Bascompte & Jordano 2014; Wootton & Stouffer 2016). Interaction  
68 asymmetry in complex networks of free-living species (Bascompte et al. 2006) as well as  
energy flow asymmetry in food webs (Rooney et al. 2006) appear as quintessential  
70 characteristics of these complex systems, closely associated with their stability. Yet our  
understanding of the factors beyond the emergence of asymmetric interactions is still very  
72 limited; for example, if any mutualistic interaction between free-living species entails an  
exchange of services, is there a “fair two-way transfer” of resources in these generalised  
74 mutualisms (Kiers et al. 2011; Chomicki et al. 2020), in other words, is there reciprocity?

76 Reciprocity, as defined herein, is the existence of a positive association in the rewards  
provided between mutualistic partners. We consider a mutualistic system to be reciprocal (to  
78 a varying degree) if higher reward provided by one organism (e.g., more pollen grains or  
fruits offered by plants) results in higher reward from its mutualistic partner (e.g., more  
80 fertilised ovules or dispersed seeds). In contrast, if higher rewards offered by one partner do

not return increased rewards by the other partner (e.g., because offering more pollen or  
82 fruits attracts more antagonists, or mutualists cannot cope with the increased availability of  
resources), those interactions would be less, or not reciprocal at all. Without an external  
84 reference, reciprocity cannot be estimated directly, as it is not possible to determine if the  
exchange in resources between partners is equal or fair. Reciprocity can only be understood  
86 using a more general perspective by comparing the resource exchange between partners  
within a specific interaction relative to the general pool of interactions. A population or  
88 community perspective will allow us to understand whether specific pairwise interactions are  
exchanging their resources at 'fair' cost, or at least at the cost set by the population or  
90 community. Aside from previous work on mycorrhizal symbiosis, less intimate and 'lagged'  
(i.e., with delayed responses beyond the interaction itself) mutualisms that examine  
92 reciprocity as hereby defined have been rarely addressed. Notwithstanding, previous studies  
explore other concepts of reciprocity using different approximations, more related to the  
94 degree of partner's dependence (see, e.g.: (Herrera 1984; Reid 1990; Burns 2003; Guerra &  
Pizo 2014).

96  
A better explored aspect of mutualistic interactions is partner dependence, i.e., how much a  
98 partner relies upon another specific partner for their services. Dependence could be  
estimated as the proportion of service obtained from a specific partner relative to the total  
100 service obtained from the whole set of interactions. Dependence differs from reciprocity in  
that it examines the reliance from the perspective of the partner, and not the whole  
102 population. Estimating dependence also allows calculating the asymmetry of interactions, by  
comparing the mutual dependence of both partners in a mutualism. Thus, asymmetry shows  
104 up when a species/organism depends a lot on one partner but, in turn, this one does not rely  
too much on that particular pairwise interaction (Jordano 1987; Bascompte et al. 2006;  
106 Vázquez et al. 2007).

108 In fact a generalised property of free-living species networks is the high frequency of weak  
interactions (Jordano 1987) so that when interactions are strong, they are invariably highly  
110 asymmetric. This pattern in the mode of interaction between organisms is known as  
disassortativity, whereby organisms with high-degree tend to interact with organisms of  
112 lower-degree (Barabási 2016), and is recurrently found in biological networks (Newman  
2003). Weak links appear a characteristic feature of complex systems made up of highly  
114 diversified components (Granovetter 1973; Csermely 2009) and provide support for their  
stability (McCann et al. 1998; Berlow 1999). Most previous analyses of network patterns in  
116 real-world ecosystems have considered species-level interactions. Yet, interaction  
asymmetries at the individual-level remain largely unexplored, despite likely being the most  
118 appropriate level to address interaction outcomes (Clark *et al.* 2011). Actual ecological  
interactions in nature that we can observe, sample, monitor, and document, occur from  
120 interspecific encounters among individuals of the partner species (Dupont et al. 2014;  
Jordano 2016). One might therefore wonder if, when looking at a more refined level (e.g.,  
122 from species to individuals), we could still expect asymmetry in their mutual dependence.

124 Few studies so far have analysed interaction asymmetry beyond variation in just interaction  
frequency or strength, e.g., further examining differences in interaction quality (Herrera  
126 1984; Jordano 1987; Guerra & Pizo 2014; González-Castro *et al.* 2022). Interaction  
outcomes may yield very different results from those expected solely on the basis of  
128 interaction frequency (Janzen 1983), and so it is possible that infrequent interactions result  
in higher fitness values than frequent interactions, affecting the reciprocity balance between  
130 the mutual dependencies. A useful tool to measure the functional outcome (fitness) of  
mutualistic relationships in terms of both interaction quantity and quality is the effectiveness  
132 framework (Schupp 1993; Schupp et al. 2017, Fig.1A). Considering individual variation and

interaction outcomes expands our understanding of the potential consequences, e.g.,  
134 demographic or evolutionary, that depend on fitness variation among individual partners,  
especially when effectiveness and its components are estimated for both the plant and  
136 animal species sets.

138 In this study we calculate the two-sided rewards for seed dispersal mutualistic interactions  
between plants and animal frugivores by means of the Resource Provisioning Effectiveness  
140 (RPE) and Seed Dispersal Effectiveness (SDE) frameworks. We look at mutual reciprocity  
(i.e., the balance in the exchange of resources) from an individual perspective in a plant  
142 population using SDE and RPE as estimates for the reward obtained in the relationship (Fig.  
1D). We also explore if mutualistic dependencies are still asymmetrical when looking at a  
144 plant individual perspective and when incorporating not only the frequency of the  
interactions, but also their quality (i.e., interaction outcome) (Fig. 1E). For this purpose we  
146 use as study organism the super-generalist plant species *Pistacia lentiscus*  
(Anacardiaceae). Super-generalist species interact with a large part of the local diversity of  
148 partner species and connect semi-independent modules in the community, conferring them  
a fundamental role in ecological networks as they provide great cohesion (Guimarães et al.  
150 2011). The analysis of individual-based, pairwise interactions thus allows a direct link to  
evolutionary approaches based on empirical data of fitness variation in relation to phenotypic  
152 traits and the interactions modes of individuals as a basis to understand natural selection in  
mutualisms. A two-sided study of mutualism at this individual level provides us with  
154 information on the diversity of individual plant rewards, the diversity of mutualistic partners  
and their effects, and the consequences on resource exchange between them.

156 Here we address these specific objectives: 1) characterise the effectiveness of the mutual  
beneficial service between individual plants and their frugivorous species, 2) test if the  
158 service provided between partners in terms of the amount of reward is reciprocal, and 3)

160 explore if there exists asymmetry in the mutual dependencies when looking at a plant  
individual level and considering interaction outcomes, that is, accounting for interaction  
quality beyond interaction frequency.

162

## METHODS

### 164 Species and study site

*Pistacia lentiscus* (Anacardiaceae) is a dioecious and anemophilous pollinated shrub that  
166 can be considered as a 'foundation species' (Whitham *et al.* 2006) playing a central role in  
the landscape physiognomy of lowland Mediterranean scrublands. Numerous resident and  
168 migrant frugivorous birds rely on lentisc fruits as a nutritional resource (González-Varo *et al.*  
2019) and act as its seed dispersers, with infrequent consumption by mammals (Perea *et al.*  
170 2013).

Fieldwork was conducted at two study sites in Doñana National Park (Huelva, SW Spain):  
172 La Mancha del Rabicano in El Puntal site (EP) and Laguna de las Madroñas (LM). Both  
areas consist of Mediterranean sclerophyllous scrubland dominated by lentiscs (*Pistacia*  
174 *lentiscus*) coexisting with a total of 28 fleshy-fruited species recorded in the area.

A total of 80 individual lentisc plants were marked, 40 per study site (Suppl. Mat. A). In order  
176 to estimate the resource provisioning and seed dispersal effectiveness (RPE and SDE, Fig.  
1), we studied the frequency (i.e., the quantity; QTC) and the functional outcome (i.e., the  
178 quality; QLC) of the pairwise interactions between the individual lentiscs and the avian  
frugivores present in the area.

180

182 Interaction frequency: QTC

The interaction frequency of *Pistacia lentiscus* plants with avian frugivore species was  
184 assessed through DNA-barcoding techniques and continuous-monitoring cameras (Quintero  
*et al.* 2021; Suppl. Mat. B). Individual plant monitoring took place during the complete fruiting  
186 season, between September 2019 and March 2020.

For molecular DNA analysis, we placed seed traps beneath individual plants, where we  
188 collected a total of 2691 faecal and seed samples (1913 for EP and 778 for LM).

Identification of visiting species was done applying DNA-barcoding analysis to collected  
190 samples. Animal-origin DNA present in the surface of the samples was extracted, amplified  
and then sequenced following protocol in González-Varo *et al.* 2014 with minor modifications  
192 (Suppl. Mat. B.1). Retrieved sequences were identified using the BOLD Systems database  
(<https://www.boldsystems.org/>) or the BLAST from the NCBI  
194 (<https://blast.ncbi.nlm.nih.gov/Blast.cgi>). Identification success rate of the analysed samples  
was 94% (n = 2285).

196 With monitoring cameras we recorded animal visitation and feeding events in focal plants at  
EP site. All individual plants were monitored every fortnight along the fruiting season,  
198 accumulating c.19 h observation per plant (Suppl. Mat. B.2). Video recordings were  
analysed with the help of the motion detection program DeepMeerkat (Weinstein 2018;  
200 Suppl. Mat. B.2). We obtained the feeding frequency of animal species (i.e. fraction of visits  
with actual fruit consumption) and the number of fruits consumed per visit. Overall, cameras  
202 recorded 3790 visits. Species identification was possible for 91% of the visits (n = 323 visits  
by unknown species). A total of 37 animal species were identified to be interacting with the  
204 individual plants of which 26 species were frugivorous birds and 24% of them included  
apparent feeding records.



206 The total number of frugivorous species recorded was 27; 26 recorded with cameras and 22  
with DNA-barcoding. Interaction accumulation curves (IAC) were used to determine both  
208 DNA-barcoding and video recording sampling completeness (see Suppl. Mat. B.3; Colwell &  
Coddington 1994; Jordano 2016). Overall sampling completeness was 93% for both  
210 methods (sensu Chacoff *et al.* 2012); 95% just for cameras and 96% just for DNA-barcoding.

To estimate the total number of fruits consumed by each bird species at each individual  
212 plant (Fig. 2) we multiplied these four sequential steps: (1) the total number of visits at each  
site, (2) the probability that a given bird species visits a particular plant, (3) the probability  
214 that a visit includes a feeding event, and (4) the number of fruits/seeds consumed per visit  
by each bird species. We estimated these quantities using Bayesian models fitted with Stan  
216 (Stan Development Team 2022) and brms (Bürkner 2017) (Suppl. Mat. E.1). This approach  
allowed us to account for more realistic estimates of uncertainty and obtain probabilistic  
218 estimates for few unobserved quantities.

#### Interaction outcome for the animal: QLC - RPE

220 Plant quality was defined as the energetic reward provided per fruit or seed (for granivorous  
birds; see Table S.A.1 for frugivory type categories). We collected fruits from each plant  
222 (mean = 31 fruits, range = 17-63, Suppl. Mat. C) and measured both pulp and seed fresh  
mass. Fresh mass was converted to dry mass using *P. lentiscus* water % content (Jordano  
224 1984). We then multiplied the pulp and seed dry mass by their estimated energy yields:  
25.25 kJ/dry g of pulp and 28.14 kJ/dry g of seed (see Suppl. Mat. E.2; Herrera 1987;  
226 MacLean *et al.* 2003; Khiari *et al.* 2020).

#### Interaction outcome for the plant: QLC - SDE

228 We used Bayesian models (Suppl. Mat. E.3) to estimate the quality of animals as seed  
dispersers according to: (1) probability of seeds to escape granivorous bird predation during

230 handling, (2) microhabitat use by each bird species, (3) probability of seeds escaping rodent  
post-dispersal predation, and (4) probability of seedling emergence and early survival (past  
232 their first summer) in each specific microhabitat. The product of these steps rendered the  
probability of seedling recruitment resulting from the consumption of one fruit by a specific  
234 avian consumer.

The probability of seeds to escape bird predation was estimated by counting the number of  
236 intact seeds manipulated by predators (identified through DNA-barcoding) collected in seed  
traps beneath plants (Suppl. Mat. D.1). Microhabitat use by different bird species was  
238 inferred from the seed rain of *P. lentiscus* seeds collected at five microhabitats: under  
*Pistacia lentiscus* conspecifics (PL), under other fleshy fruited species (FR), under non-  
240 fleshy fruited species (NF), under pine trees (*Pinus pinea*; PP), and open ground areas (OA)  
(see Suppl. Mat. D.2). We identified the bird species through DNA-barcoding of collected  
242 seeds. For each microhabitat we also measured post-dispersal predation, seedling  
emergence and survival through seed removal and seed-sowing experiments (Suppl. Mat.  
244 D.3, D.4).

#### Effectiveness calculations

246 We calculated the final effectiveness as the product of quantity and quality components  
(Suppl. Mat. E; Fig. S.E.1). The quantity component (i.e., total number of fruits consumed by  
248 a specific bird on a given plant) was common for both the animal and plant's perspective.  
Quality for the animal was the energy acquired per fruit/seed consumed. Quality for the plant  
250 was the probability that a consumed fruit becomes a seedling surviving its first summer.  
Resource Provisioning Effectiveness (RPE) therefore estimates the total energy provided by  
252 each plant to each bird species along the fruiting season, and Seed Dispersal Effectiveness  
estimates the potential number of seedlings recruited by each plant through interacting with  
254 each bird species.

## Reciprocity

256 To estimate the reciprocity we used Pearson correlation coefficients between the log-  
transformed RPE and SDE values. We aggregated the total rewards offered and received by  
258 each individual plant across all bird species, using the 1000 posterior distribution samples  
(see Suppl. Mat F.1). A high positive correlation would indicate high reciprocity, meaning  
260 that plants providing high resource provisioning (RPE) obtain in turn high dispersal  
effectiveness (SDE).

## 262 Calculating dependence and asymmetry between individual plants and bird species

We calculated mutual dependence ( $d$ ) for each pairwise interaction (Suppl. Mat. F.2). Two  
264 separate dependence values were obtained, one for the plant ( $d_{P_i \rightarrow A_j}$ ) and one for the  
animal species ( $d_{A_j \rightarrow P_i}$ ).

266 eq. 1a:  $d_{P_i \rightarrow A_j} = \frac{SDE_{ij}}{\sum_{A=1}^n SDE_i}$ , for the dependence of *P. lentiscus* plant *i* on animal species *j*;  
and

268 eq. 1b:  $d_{A_j \rightarrow P_i} = \frac{RPE_{ji}}{\sum_{P=1}^m RPE_j}$ , for the dependence of animal species *j* on plant *i*,

where  $d$  is the dependence of plant *i* on animal species *j*, or vice versa;  $SDE_{ij}$  is the  
270 estimated number of seedlings recruited by plant *i* via frugivore species *j*;  $RPE_{ji}$  is the  
amount of kilojoules plant *i* provided to frugivore species *j*; and  $n$  and  $m$  represent the total  
272 number of animal species and individual plants, respectively.

Interaction asymmetry (AS) is defined as (Bascompte *et al.* 2006; Vázquez *et al.* 2007):

274 eq. 2:  $AS_{P_i A_j} = \frac{d_{P_i \rightarrow A_j} - d_{A_j \rightarrow P_i}}{\max(d)}$

AS values can range from -1 to 1, where 0 indicates total symmetry (i.e. both partners  
276 depend on each other with the same intensity), values approaching +1 indicate that the plant  
is more dependent on the animal than *vice versa*, and negative values indicate that the  
278 animal is more dependent on the plant than the plant on the animal.

We performed different null models to test the robustness of the observed asymmetry values  
280 to our sampling design (see Suppl. Mat. H). We did not find evidence for asymmetry values  
being significantly biased in any of these null models.

282

## RESULTS

### 284 Plant individual-based interactions

We estimated that birds consumed a total of  $2.2 \times 10^5$  fruits from the 80 marked plants at  
286 both *P. lentiscus* populations (90% credibility interval:  $1.5 \times 10^5$  -  $6.6 \times 10^5$ ). This represents  
~20% of the total number of fruits produced by these plants in the 2019-20 season (Supp  
288 Mat G.1). We detected 27 bird species consuming *P. lentiscus* fruits, of which 12 are  
considered residents, 9 summer or trans-Saharan migrants and 6 winter migrants (see  
290 Suppl. Mat. A). More than 85% of the consumed fruits were consumed by just three species,  
*Curruca melanocephala*, *Erithacus rubecula* and the seed predator *Chloris chloris*. These  
292 species behaved as super-generalists, interacting with the great majority of individual *P.*  
*lentiscus* plants (see Fig. 2). The next stronger consumers were *Turdus merula* and the  
294 winter migrant *Sylvia atricapilla*.

### Resource Provisioning and Seed Dispersal Effectiveness

296 *Pistacia lentiscus* plants were highly variable in the Resource Provisioning Effectiveness  
(RPE) provided to avian species (Fig. 3). Bird species consumed a median of 97 fruits/seeds

298 on each plant (interquartile range: 23 - 474). We estimated that *Curruca melanocephala* and  
300 *Erithacus rubecula* may have eaten more than 4000 fruits, and *Chloris chloris* more than  
just a small proportion of the available crop offered: most plants had less than half their crop  
302 size removed by birds (see removal success in Suppl. Mat. G.1). The quantity component  
accounted for almost all (93%) of the variation in RPE (Suppl. Mat. S.E.5). Regarding  
304 quality, we found up to 7-fold differences in the energetic content of fruits/seeds from  
individual plants. For fruit/pulp consumers, quality ranged from 0.11 to 0.77 kJ/fruit, whereas  
306 seed predators obtained between 0.11 and 0.66 kJ/seed. Birds consumed fruits and seeds  
of varied quality within those ranges, following energy availability (Suppl. Mat. G.2). In  
308 general, avian consumption was higher in plants with larger crops, canopy area, and pulp  
content (Suppl. Mat. G.3).

310 Seed Dispersal Effectiveness (SDE) was also more determined by the quantity (fruit/seed  
consumption) than the quality component (probability of seedling recruitment), which varied  
312 little among bird species (variance partitioning: quantity = 69%, quality = 31%; Suppl. Mat.  
E.5) (Fig. 3). Excluding seed predators, with negligible contributions to recruitment (as they  
314 destroyed ~99.9% of the seeds consumed), all bird species had a similar probability of  
producing a seedling surviving the first summer drought (around  $10^{-4}$  per consumed fruit),  
316 with *Curruca melanocephala* emerging as the highest quality disperser, followed by other  
members of the Sylviidae family. Differences among frugivore species in dispersal quality  
318 stem from their distinctive microhabitat use (Suppl. Mat. E.3.1) and existing trade-offs  
between recruitment stages in different microhabitats (Suppl. Mat. E.3.2; E.3.3). For  
320 example, seeds falling under *Pinus pinea* trees had the highest probability of surviving  
rodent predation, followed by those arriving to open areas. Seedling emergence and  
322 survival, on the other hand, was highest in open areas and lowest beneath *Pinus pinea*.  
Overall, open area was the microhabitat with highest probability of recruitment, yet very few

324 seeds arrived to it, hence this microhabitat hardly contributed to recruitment. The relatively  
high quality of *C. melanocephala* emerged from its preferential dispersal towards the most  
326 suitable microhabitats: beneath non-fleshy fruited plants and *P. pinea*. In contrast, heavy *P.*  
*lentiscus* fruit consumers like *E. rubecula* showed medium quality as it frequently deposits  
328 seeds under *P. lentiscus* plants, a microhabitat where the probability of escaping post-  
dispersal seed predation and seedling survival were medium-low.

330 Despite the quite high fruit consumption, overall probabilities of recruitment at the final stage  
considered in our study (i.e., seedlings surviving the first summer drought) were rather low.  
332 Even the most intense pairwise interaction observed (involving *C. melanocephala*) would  
have recruited roughly half a seedling surviving its first summer (SDE value of 0.53).

### 334 Reciprocity

We found high reciprocity in the interactions between individual *P. lentiscus* plants and their  
336 bird consumers: on average, plants supplying more energy (i.e., having more fruits/seeds  
consumed) also recruited a larger number of seedlings (Fig. 4). This is supported by the high  
338 correlation between RPE and SDE (mean Pearson  $r$  on log-log values = 0.93; mean 90% CI  
= 0.90 - 0.96; see Suppl. Mat. F.1). In other words, the larger the reward provided by one  
340 interaction partner (the plant), the larger the reward contributed by the other partner (birds).  
This high reciprocity stems from the fact that both RPE and SDE were mainly driven by the  
342 quantity component (i.e., intensity of consumption) rather than by differences in plant and  
frugivores quality. As a result, plants mobilising more fruits also recruited more seedlings (on  
344 average), regardless of differences in the composition of their frugivore assemblages.  
Additionally, plants involved in greater rewards tended to have larger crop sizes and were  
346 consumed by a higher number of bird species.

348 Dependence and Asymmetry

Dependencies on the mutualistic partner were in general low (Fig. 5). Most bird-plant  
350 pairwise interactions had dependencies below 0.25, meaning that most interactions actually  
reported only a small fraction of the total reward (i.e., energy income or seedlings recruited)  
352 for either partner (birds and plants, respectively). There were, however, some strong, highly-  
dependent interactions, namely those involving the two main dispersers *E. rubecula* and *C.*  
354 *melanocephala*: most plants strongly depended on both bird species for effectively  
dispersing their seeds and recruiting (Fig. 5, left). In contrast, avian species were remarkably  
356 less dependent on individual plants. Only a few rare bird species (e.g. *Turdus viscivorus* and  
*Hippolais polyglotta* among fruit consumers, and *Coccothraustes coccothraustes* and  
358 *Pyrrhula pyrrhula* among seed predators) showed high dependency on specific plants (Fig.  
5, centre).

360 When comparing the corresponding dependencies of each partner, we found that most bird-  
plant interactions were highly asymmetric (Fig. 5, right) for two main reasons. First, most  
362 plants depended strongly on the main avian consumers (*C. melanocephala*, *E. rubecula*)  
while these birds had low dependencies on each individual plant (asymmetry values towards  
364 1). That is, most individual plants required the service of these two frugivores for effective  
dispersal and recruitment, whereas these birds were feeding and obtaining energy from  
366 many plants, thus hardly depending on any particular one. Second, when the animals had  
high dependency on a particular plant (asymmetry values towards -1), the plants in turn  
368 hardly depended on that particular bird. This is explained by the fact that such interactions  
were dominated by seed predators, pulp consumers, and locally uncommon bird species,  
370 which provided no or very low seedling recruitment for plants. Symmetric interactions (where  
both partners had similar dependency values) were scarce and represented by strongly  
372 frugivorous and moderately abundant birds such as *T. merula*, *S. atricapilla* and *Cyanopica*

374 *cooki*. In these cases, individual plants were similarly important for energy provisioning for these birds as they were for providing effective dispersal to plants.

## 376 DISCUSSION

We report interaction patterns for a super-generalist plant species, with the aim to document variation in mutual dependence with animal seed dispersers at the plant individual level and degree of interaction reciprocity at the population scale. This allowed us to establish a proper link between the structure of individual-based interaction networks and the consequences in terms of fitness and local plant population recruitment.

### 382 Interaction intensity dominates partner effectiveness

Most previous studies have dealt with interaction effectiveness from a species-level, community perspective (but see Guerra *et al.* 2017; Palacio 2019; Jácome-Flores *et al.* 2020). The individual focus in *P. lentiscus* has revealed ample variation in fruit consumption by animal frugivores at individual plants, while documenting smaller variances in the quality of partner's reward.

388 Consumption intensity disproportionately affected the magnitude of the partner's effectiveness. Both RPE and SDE variation were driven by the quantity component, rather than quality, with a 7-fold difference in individual energy content and a ~1.3-fold variation in frugivore quality, but then three orders of magnitude variation in fruit consumption (quantity). This indicates that interaction frequency per se is acting as a good surrogate of effectiveness, as found in previous studies (Vázquez *et al.* 2005). Yet accounting for interaction quality may change interpretations of partner effectiveness in other systems (e.g. rank reversals in González-Castro *et al.* 2022).



396 The resource provisioning effectiveness landscape (RPE, Fig. 3) did not reflect clear  
preferences of bird species for plants with energy-rich fruits. However, when aggregating the  
398 consumption of non-granivorous birds by individual plants, we found that large plants, with  
larger fruit crops, producing heavier (more energetic) fruits, dispersed a larger number of  
400 fruits overall (Suppl. Mat. G.3). These traits are well known to affect frugivory (Sallabanks  
1993; Ortiz-Pulido *et al.* 2007; Schupp *et al.* 2019) and are as well related to the ontogeny,  
402 growth and size hierarchies in plant populations (Weiner & Solbrig 1984). Other factors not  
analysed here, such as secondary compounds, fruit accessibility or fruiting neighbourhood  
404 could also be affecting consumption patterns (Moermond & Denslow 1985; Cipollini & Levey  
1997; Carlo *et al.* 2007; Tonos *et al.* 2021).

406 Legitimate seed dispersers also exhibited limited variation in the quality component of seed  
dispersal effectiveness (SDE, Fig. 3). The resulting probability of recruitment was  
408 surprisingly similar between frugivore species, indicating a broad functional redundancy in  
their dispersal service (González-Castro *et al.* 2015). However, when considering the final  
410 effectiveness, two bird species (*C. melanocephala* and *E. rubecula*) emerged as the main  
contributors to seedling recruitment due to their high consumption. The redundancy  
412 encountered in the quality component would make the dispersal mutualism more robust to  
the loss of bird species, or fluctuations in bird populations (see Zamora 2000); yet marked  
414 changes in bird abundance, particularly of the dispersers that consume the most, could  
compromise plant recruitment.

#### 416 Reciprocity in partner rewards as a feature of mutualistic systems

Although the exchange of rewards between bird species and individual plants varied over  
418 several orders of magnitude, there was a high correlation between the rewards obtained by  
each partner in the interaction. This result points to a stable and fair two-way transfer in the  
420 exchange of mutualistic services. In the case of *P. lentiscus*, the reciprocity in the rewards

stems from the strong dominance of the quantity (i.e., intensity of consumption), a common  
422 component on both resource provisioning and seed dispersal effectiveness. Such high  
reciprocity would appear characteristic of many seed dispersal systems and other  
424 generalised, resource-based mutualisms (Wheelwright & Orians 1982; Ollerton 2006). Yet,  
reciprocity in a mutualistic system could be compromised whenever there are large  
426 differences between partners quality (i.e., fruit energetic content, or recruitment probabilities  
for different dispersers), as occurs for example in systems with highly heterogeneous  
428 frugivore assemblages (González-Castro *et al.* 2015; García-Rodríguez *et al.* 2021).  
Reciprocity can also break down when antagonists differently disrupt mutualistic interactions  
430 of plants with legitimate seed dispersers (Jácome-Flores *et al.* 2020); yet mutualism  
breakdown scenarios have been largely examined for intimate interactions, not for free-living  
432 species (Sachs & Simms 2006; Chomicki & Renner 2017).

Aside from the high overall reciprocity, we found a ‘diminishing return’ effect, so that the  
434 number of seedlings recruited did not increase in the same proportion as the total energy  
provided by plants (mean slope of log SDE vs log RPE and SD =  $0.83 \pm 0.06$ ; Fig. 4). This  
436 diminishing return in the number of seedlings recruited per unit of energy was not caused by  
interactions with seed predators (slope of the log-log relationship excluding seed predators:  
438 0.85). *Chloris chloris*, the most frequent seed predator, attacked all plants in similar  
proportion. Instead, the deviation from strict proportionality (log slope = 1) could be caused  
440 by (i) plants producing heavier fruits disperse fewer seeds and recruit fewer seedlings per  
amount of energy offered than small-fruited plants, (ii) highly fecund individuals (dispersing  
442 many fruits) attracting both highly effective and less effective frugivores, and (iii) the fact that  
our analysis did not account for likely increasing recruitment probabilities with increasing fruit  
444 and seed size. If more energetic fruits containing more pulp also imply larger seeds with  
higher survival probability after dispersal (Piper 1986; Leishman *et al.* 2000), then our  
446 analysis would be underestimating the number of seedlings recruited for those plants.

Our results are consistent with previous reports evidencing that extremely high seed  
448 production and consumption are required to ensure recruitment by mother plants, given the  
sharp decreases in survival probability as seeds move along dissemination and  
450 establishment stages (Herrera *et al.* 1994; García-Fayos & Verdú 1998; Gómez-Aparicio  
2008). Following our estimates, individual lentisc plants would have to disperse >8000 seeds  
452 to have just a single recruit surviving their first summer. Thus, ensuring plant recruitment  
may require huge reproductive effort from plants, even in well-functioning dispersal  
454 mutualisms with high reciprocity.

#### Highly asymmetric dependencies between mutualistic partners

456 The vast majority of interactions between bird species and *P. lentiscus* individual plants were  
highly asymmetric: when one partner depended strongly on some partner, the latter hardly  
458 depended on the former. The dominance of asymmetric interactions was driven, first, by the  
strong dependence of nearly all *P. lentiscus* plants on the most effective dispersers (*C.*  
460 *melanocephala* and *E. rubecula*) whereas these birds consumed fruits profusely from all  
plants, hence hardly depending on any particular one. Second, seed predators (remarkably  
462 *Chloris chloris*) depended on *P. lentiscus* plants for their energy income but did not in turn  
contribute new seedlings, generating another set of asymmetric interactions. Finally, some  
464 occasional fruit consumers focused on a few plants which hardly depended on these birds  
for recruitment. The highly skewed distribution of dependence values was likely generated  
466 by the combination of varying bird abundances (Vázquez *et al.* 2007) and degree of  
frugivory, plus varying fruit production and attractiveness to seed predators and legitimate  
468 seed dispersers from the plant side.

The high asymmetry between mutualistic partners' dependence at the individual level is  
470 consistent with previous findings at the species level (Jordano 1987; Bascompte *et al.* 2006;  
Guimarães *et al.* 2006; Guerra & Pizo 2014). In Herrera (1984), most observed

472 dependencies between frugivores and plant species were also weak or highly asymmetric.  
Interestingly, *P. lentiscus* showed quite symmetric dependencies –at the species level– with  
474 its main seed dispersers. Our analysis at the individual plant level revealed that, while these  
birds rely heavily on *P. lentiscus* fruits, they did not depend on particular plants but rather  
476 spread their dependencies, generating highly asymmetric interactions. If individual birds  
could have been identified too –rather than aggregated to species level– many of those plant  
478 strong dependencies on the main consumers might in turn transform into weak links, with  
just a few strong interactions (e.g., individual, territorial birds strongly depending on a  
480 specific patch of *P. lentiscus*). Hence, stepping down to the individual level seems important  
as it may enrich our perceptions of the embedded dependencies in mutualistic systems  
482 (Tonos et al. 2022) and address the proper scale to understand emerging properties at the  
species-level interaction networks (see Clark *et al.* 2011).

484 The available evidence suggests that symmetric dependencies could be rare in mutualistic  
systems. In fact, so far they have been reported only in very specific local communities, such  
486 as honeyeater-mistletoe facultative interactions (Reid 1990) or impoverished island systems  
(González-Castro *et al.* 2022). The disassortativity in the way species interact seems to  
488 promote asymmetry in partner's dependence. Plants with a low degree (i.e., visited by one  
or few species) interacted with super-generalist avian species *C. melanocephala* and *E.*  
490 *rubecula*, which were also the most effective dispersers. At the same time, rare birds  
depended mostly on generalist plants. This favoured absence of symmetry in the  
492 dependence of rare species, agreeing with previous work arguing that reciprocal  
specialisations are rare (Joppa *et al.* 2009).

#### 494 Concluding remarks

Interactions between the individuals of a super-generalist plant with its fruit consumers have  
496 shown to be highly reciprocal in terms of the exchange of their mutualistic service, despite

partners being highly asymmetric in their mutual dependence. These aspects appear quite  
498 general to low-intimacy mutualisms among free-living species (e.g., pollination, seed  
dispersal) which are largely dependent upon interaction frequency for the harvesting of food  
500 resources by animals. A key feature for the great success of super-generalists organisms  
appears to be related to abundance parameters that define their interaction frequency and,  
502 ultimately, their fitness. In contrast, highly specialised interactions likely depend on the ability  
to maintain reciprocity by means of a fine-tuned quality service between interacting species,  
504 where dependencies between partners would likely be more symmetric and intimate  
(Guimarães et al. 2007, Kiers et al. 2011). We might expect the emergence of these patterns  
506 when mutualisms among free-living species rely on encounter frequencies whose variance  
among species is so large as to obscure variation in the quality of outcome. Exceptions may  
508 include some mutualisms in specific environmental settings (e.g., oceanic islands) or  
characterised by high specificity of the interaction. Further studies on the reward reciprocity  
510 of generalised mutualistic interactions will build up more evidence to better understand the  
compromise between animals and plants in these mutualisms and the mechanisms behind  
512 the perpetuation of mutually-beneficial relationships.

## 514 ACKNOWLEDGEMENTS

We are grateful to Juan Miguel Arroyo who provided essential support in the laboratory by  
516 working on the DNA-barcoding analysis. Camera data collection was possible thanks to the  
help of Lewis Barrett and especially Antonio López-Orta who assisted with long-hours of  
518 video screening. Video screening time was greatly facilitated by the use of DeepMeerkat on  
the EBD-CSIC data server facility, thanks to the assistance of Ben Weinstein (software  
520 developer) on parameter selection and Luis Torres on software installation. EQ is grateful to  
Rosario and Luis Carlos who kindly helped by measuring individual plants' fruit attributes.  
522 Discussions with Jorge Isla, Blanca Arroyo and Luísa Genes were invaluable to help  
improve and elucidate the implications of this study. We thank the logistic and facilities  
524 support form ICTS-RBD Doñana and the Doñana National Park for onsite access  
authorizations during the fieldwork.

526

Funding – The project leading to these results has received funding from “la Caixa”  
528 Foundation (ID 100010434), under agreement LCF/BQ/DE18/11670007. Authors were  
supported by project CGL2017-82847-P from the Agencia Estatal de Investigación, Spain  
530 and a LifeWatch ERIC-SUMHAL project (LIFEWATCH-2019-09-CSIC-13) with FEDER-EU  
funding. FRS was supported by the Talent Attraction programme from the VI Plan Propio de  
532 Investigación at Universidad de Sevilla (VI PPIT-US-2018-IV.2) and grant US-1381388  
funded by FEDER 2014-2020 and Consejería de Economía, Conocimiento, Empresas y  
534 Universidad of Junta de Andalucía.

536

538

## FIGURES

540 Figure 1. Schematic representation of the approximation used in this study for the  
characterization of plant-frugivore seed dispersal mutualisms. (A) the three main  
542 subcomponents which are present in the mutualism between any two nodes (animal  
frugivore, orange; plant individual, blue) in the network: the interaction frequency or quantity  
544 (QTC) and the two-sided quality (QLC) of the service provided by the partner: energetic yield  
provided by the plant ( $QLC_P$ ) and probability of seedlings recruitment provided by the bird  
546 ( $QLC_A$ ). The effectiveness for the two partners (seed dispersal for the plant: SDE, and  
resource provisioning for the animal: RPE) is estimated by combining these subcomponents.  
548 (B) An example adjacency matrix of quantity and quality data for the calculation of  
effectiveness (left) and the expressions to derive RPE and SDE (right). (C) Resulting  
550 calculations of RPE and SDE using the example matrix in B. (D) Reciprocity can be  
assessed by the covariation between RPE and SDE values and characterises the sign and  
552 direction of the outcome of any pairwise interaction. (E) Derivation of mutual dependence  
estimates and interaction asymmetry obtained for plant and animal partners. Dependence  
554 values for animals in the orange upper-left cell are calculated based on RPE values, while  
dependence values for plants in the blue lower-right cells are calculated based on SDE  
556 values (left matrix, see eq. 1 below for calculations). With both estimates of the mutual  
dependence matrix it is possible to calculate their asymmetry (right matrix, see eq. 2 below  
558 for calculations). Asymmetry is estimated as a standardised difference between the two  
dependence values in each interaction, and ranges between -1 and +1.

560

Figure 2. Representation of interaction network between avian consumers species and  
562 individual *Pistacia lentiscus* plants, where the node and link width is proportional to the total  
number of fruits consumed on each plant. Non-legitimate dispersers (n=7) are grouped at  
564 the left end of the network.

566 Figure 3. Effectiveness landscapes for resource provisioning (RPE) and seed dispersal  
568 (SDE). Each point represents an individual pairwise interaction. In both landscapes, the  
570 horizontal axis depicts the total number of fruits/seeds consumed by each bird species in  
572 each individual plant. In the RPE landscape, the vertical axis represents the median energy  
574 (kJ) obtained from a fruit/seed from each individual plant. In the SDE plot, the vertical axis  
576 represents the posterior median probability of recruiting a seedling from a fruit ingested by  
578 each bird species. Hence the product of the horizontal (Quantity) and vertical (Quality) axis  
gives the effectiveness of each bird-plant pairwise interaction: the total energy (kJ) in the  
case of RPE, and total number of plant recruits for SDE. Different combinations of quantity  
and quality can produce equal effectiveness values, as shown by isolines. Note seed  
predators are not shown in the SDE landscape visualisation, as their dispersal quality is zero  
or close to zero and their inclusion distorts the graph (see Supp Mat E.4 for complete SDE  
landscape).

580 Figure 4. Relationship between the total energetic supply provided by individual plants  
582 (aggregating all its consumer bird species) and the number of seedlings recruited by each  
584 plant ( $n = 79$ ). The positive relationship indicates highly reciprocal interactions: the higher  
the reward offered by the plant (i.e., more fruits consumed), the higher the reward received  
586 from its bird consumers. Dot size represents plants' initial crop size and colour intensity  
indicates the number of animal species partners. Note both axes are in logarithmic scale.

588 Figure 5. Interaction matrices between *Pistacia lentiscus* individual plants and their avian  
590 consumers. The first matrix (left) depicts how much each plant seed dispersal effectiveness  
(number of seedlings recruited) depends on each bird species, whereas the second matrix  
(center) shows how much the resource provisioning effectiveness (energy obtained) of each



bird species depends on each particular plant. Both matrices range from 0 (no dependence  
592 at all) to 1 (total dependence on that particular partner). The third matrix (right) shows the  
asymmetry in dependence for each unique bird-plant pairwise interaction. Colours gradually  
594 veering toward blue (asymmetry values approaching 1) indicate interactions where the plant  
is more dependent on the animal than vice versa, whereas colours veering toward orange  
596 (i.e., asymmetry approaching -1) indicate interactions where the animal is more dependent  
on the plant. Symmetrical interactions, where the dependence of both partners is similar, are  
598 represented by yellow tones (asymmetry values close to 0). The lower graphs represent the  
frequency distribution of the above matrix values. Animal species codes in alphabetical  
600 order: *C.cae* = *Cyanistes caeruleus*, *C.can* = *Curruca cantillans*, *C.chl* = *Chloris chloris*,  
*C.coc* = *Coccothraustes coccothraustes*, *C.com* = *Curruca communis*, *C.coo* = *Cyanopica*  
602 *cooki*, *C.hor* = *Curruca hortensis*, *C.mel* = *Curruca melanocephala*, *C.pal* = *Columba*  
*palumbus*, *C.und* = *Curruca undata*, *E.rub* = *Erithacus rubecula*, *F.coe* = *Fringilla coelebs*,  
604 *F.hyp* = *Ficedula hypoleuca*, *H.pol* = *Hippolais polyglotta*, *L.meg* = *Luscinia megarhynchos*,  
*L.mer* = *Lanius meridionalis*, *M.str* = *Muscicapa striata*, *Pmaj* = *Parus major*, *P.pho* =  
606 *Phoenicurus phoenicurus*, *P.pyr* = *Pyrrhula pyrrhula*, *S.atr* = *Sylvia atricapilla*, *S.bor* = *Sylvia*  
*borin*, *S.rub* = *Saxicola rubicola*, *S.uni* = *Sturnus unicolor*, *T.mer* = *Turdus merula*, *T.phi* =  
608 *Turdus philomelos*, *T.vis* = *Turdus viscivorus*.

## 610 REFERENCES

- 612 Barabási, A.-L. (2016). *Network science*. Cambridge University Press, Cambridge.
- Bascompte, J. & Jordano, P. (2014). *Mutualistic Networks*. Princeton University Press.
- 614 Bascompte, J., Jordano, P. & Olesen, J.M. (2006). Asymmetric Coevolutionary Networks Facilitate Biodiversity Maintenance. *Science*, 312, 431.
- 616 Berlow, E.L. (1999). Strong effects of weak interactions in ecological communities. *Nature*, 398, 330–334.
- 618 Bürkner, P.-C. (2017). brms: An R Package for Bayesian Multilevel Models Using Stan. *J. Stat. Softw.*, 80, 1–28.
- 620 Burns, K.C. (2003). Broad-scale reciprocity in an avian seed dispersal mutualism. *Glob. Ecol. Biogeogr.*, 12, 421–426.
- 622 Carlo, T.A., Aukema, J.E. & Morales, J.M. (2007). Plant-frugivore interactions as spatially explicit networks: integrating frugivore foraging with fruiting plant spatial patterns. In:
- 624 *Seed dispersal: theory and its application in a changing world* (eds. Dennis, A.J., Schupp, E.W., Green, R.J. & Westcott, D.A.). CABI, Wallingford, pp. 369–390.
- 626 Chacoff, N.P., Vázquez, D.P., Lomáscolo, S.B., Stevani, E.L., Dorado, J. & Padrón, B. (2012). Evaluating sampling completeness in a desert plant-pollinator network: Sampling a plant-pollinator network. *J. Anim. Ecol.*, 81, 190–200.
- Chomicki, G., Kiers, E.T. & Renner, S.S. (2020). The Evolution of Mutualistic Dependence.
- 630 *Annu. Rev. Ecol. Evol. Syst.*, 51, 409–432.
- Chomicki, G. & Renner, S.S. (2017). Partner abundance controls mutualism stability and the
- 632 pace of morphological change over geologic time. *Proc. Natl. Acad. Sci. U. S. A.*, 114, 3951–3956.
- 634 Cipollini, M.L. & Levey, D.J. (1997). Secondary Metabolites Of Fleshy Vertebrate-Dispersed Fruits: Adaptive Hypotheses And Implications For Seed Dispersal. *Am. Nat.*, 150,

- 636 346–372.
- Clark, J.S., Bell, D.M., Hersh, M.H., Kwit, M.C., Moran, E., Salk, C., *et al.* (2011). Individual-  
638 scale variation, species-scale differences: inference needed to understand diversity:  
Individual-scale variation, species-scale differences. *Ecol. Lett.*, 14, 1273–1287.
- 640 Colwell, R.K. & Coddington, J.A. (1994). Estimating terrestrial biodiversity through  
extrapolation. *Philos. Trans. R. Soc. Lond. B. Biol. Sci.*, 345, 101–118.
- 642 Csermely, P. (2009). *Weak Links: A Universal Key of Network Diversity and Stability*.  
Springer, Dordrecht Heidelberg London New York.
- 644 Dupont, Y.L., Trøjelsgaard, K., Hagen, M., Henriksen, M.V., Olesen, J.M., Pedersen, N.M.E.,  
*et al.* (2014). Spatial structure of an individual-based plant-pollinator network. *Oikos*,  
646 123, 1301–1310.
- García-Fayos, P. & Verdú, M. (1998). Soil seed bank, factors controlling germination and  
648 establishment of a Mediterranean shrub: *Pistacia lentiscus* L. *Acta Oecologica*, 19,  
357–366.
- 650 García-Rodríguez, A., Albrecht, J., Farwig, N., Frydryszak, D., Parres, A., Schabo, D.G., *et*  
*al.* (2021). Functional complementarity of seed dispersal services provided by birds  
652 and mammals in an alpine ecosystem. *J. Ecol.*, 1365-2745.13799.
- Gómez-Aparicio, L. (2008). Spatial patterns of recruitment in Mediterranean plant species:  
654 linking the fate of seeds, seedlings and saplings in heterogeneous landscapes at  
different scales. *J. Ecol.*, 96, 1128–1140.
- 656 González-Castro, A., Calviño-Cancela, M. & Nogales, M. (2015). Comparing seed dispersal  
effectiveness by frugivores at the community level. *Ecology*, 96, 808–818.
- 658 González-Castro, A., Morán-López, T., Nogales, M. & Traveset, A. (2022). Changes in the  
structure of seed dispersal networks when including interaction outcomes from both  
660 plant and animal perspectives. *Oikos*, 2.
- González-Varo, J.P., Arroyo, J.M. & Jordano, P. (2014). Who dispersed the seeds? The use

- 662 of DNA barcoding in frugivory and seed dispersal studies. *Methods Ecol. Evol.*, 5,  
806–814.
- 664 González-Varo, J.P., Arroyo, J.M. & Jordano, P. (2019). The timing of frugivore-mediated  
seed dispersal effectiveness. *Mol. Ecol.*, 28, 219–231.
- 666 Granovetter, M.S. (1973). The Strength of Weak Ties. *Am. J. Sociol.*, 78, 1360–1380.
- Guerra, T.J., Dayrell, R.L.C., Arruda, A.J., Dáttilo, W., Teixido, A.L., Messeder, J.V.S., *et al.*  
668 (2017). Intraspecific variation in fruit–frugivore interactions: effects of fruiting  
neighborhood and consequences for seed dispersal. *Oecologia*, 185, 233–243.
- 670 Guerra, T.J. & Pizo, M.A. (2014). Asymmetrical Dependence Between a Neotropical  
Mistletoe and its Avian Seed Disperser. *Biotropica*, 46, 285–293.
- 672 Guimarães Jr, P.R., Jordano, P. & Thompson, J.N. (2011). Evolution and coevolution in  
mutualistic networks. *Ecol. Lett.*, 14, 877–885.
- 674 Guimarães, P.R., Rico-Gray, V., Furtado dos Reis, S. & Thompson, J.N. (2006).  
Asymmetries in specialization in ant–plant mutualistic networks. *Proc. R. Soc. B Biol.*  
676 *Sci.*, 273, 2041–2047.
- Guimarães, P.R., Rico-Gray, V., Oliveira, P.S., Izzo, T.J., dos Reis, S.F. & Thompson, J.N.  
678 (2007). Interaction Intimacy Affects Structure and Coevolutionary Dynamics in  
Mutualistic Networks. *Curr. Biol.*, 17, 1797–1803.
- 680 Herrera, C.M. (1984). A Study of Avian Frugivores, Bird-Dispersed Plants, and Their  
Interaction in Mediterranean Scrublands. *Ecol. Monogr.*, 54, 1–23.
- 682 Herrera, C.M. (1987). Vertebrate-Dispersed Plants of the Iberian Peninsula: A Study of Fruit  
Characteristics. *Ecol. Monogr.*, 57, 305–331.
- 684 Herrera, C.M., Jordano, P., Lopez-Soria, L. & Amat, J.A. (1994). Recruitment of a Mast-  
Fruiting, Bird-Dispersed Tree: Bridging Frugivore Activity and Seedling  
686 Establishment. *Ecol. Monogr.*, 64, 315–344.
- Jácome-Flores, M.E., Jordano, P., Delibes, M. & Fedriani, J.M. (2020). Interaction motifs

- 688 variability in a Mediterranean palm under environmental disturbances: the  
mutualism–antagonism continuum. *Oikos*, 129, 367–379.
- 690 Janzen, D.H. (1983). Seed and pollen dispersal by animals: convergence in the ecology of  
contamination and sloppy harvest. *Biol. J. Linn. Soc.*, 20, 103–113.
- 692 Johnstone, R.A. & Bshary, R. (2008). Mutualism, market effects and partner control. *J. Evol.*  
*Biol.*, 21, 879–888.
- 694 Joppa, L.N., Bascompte, J., Montoya, J.M., Solé, R.V., Sanderson, J. & Pimm, S.L. (2009).  
Reciprocal specialization in ecological networks. *Ecol. Lett.*, 12, 961–969.
- 696 Jordano, P. (1984). Relaciones entre plantas y animales frugivoros en el matorral  
mediterráneo de área de Doñana. Universidad de Sevilla, Sevilla, Spain.
- 698 Jordano, P. (1987). Patterns of Mutualistic Interactions in Pollination and Seed Dispersal:  
Connectance, Dependence Asymmetries, and Coevolution. *Am. Nat.*, 129, 657–677.
- 700 Jordano, P. (2016). Sampling networks of ecological interactions. *Funct. Ecol.*, 30, 1883–  
1893.
- 702 Khiari, K., Tarabet, L., Awad, S., Loubar, K., Mahmoud, R., Tazerout, M., *et al.* (2020).  
Optimization of bio-oil production from Pistacia lentiscus seed liquefaction and its  
704 effect on diesel engine performance and pollutant emissions. *Biomass Convers.*  
*Biorefinery*.
- 706 Kiers, E.T., Duhamel, M., Beesetty, Y., Mensah, J.A., Franken, O., Verbruggen, E., *et al.*  
(2011). Reciprocal Rewards Stabilize Cooperation in the Mycorrhizal Symbiosis.  
708 *Science*, 333, 880–882.
- Leishman, M., Wright, I., Moles, A. & Westoby, M. (2000). The Evolutionary Ecology of Seed  
710 Size. In: *Seeds: The Ecology of Regeneration in Plant Communities* (ed. Fenner, M.).  
CAB International, Wallingford, UK, pp. 31–58.
- 712 MacLean, W.C., Warwick, P. & Food and Agriculture Organization of the United Nations  
(Eds.). (2003). *Food energy: methods of analysis and conversion factors: report of a*

- 714 *technical workshop*. FAO food and nutrition paper. Presented at the Technical  
Workshop on Food Energy: Methods of Analysis and Conversion Factors. Food and  
716 Agriculture Organization of the United Nations, Rome.
- McCann, K., Hastings, A. & Huxel, G.R. (1998). Weak trophic interactions and the balance  
718 of nature. *Nature*, 395, 794–798.
- Moermond, T.C. & Denslow, J.S. (1985). Neotropical Avian Frugivores: Patterns of  
720 Behavior, Morphology, and Nutrition, with Consequences for Fruit Selection. *Ornithol.  
Monogr.*, 865–897.
- 722 Newman, M.E.J. (2003). Mixing patterns in networks. *Phys. Rev. E*, 67, 026126.
- Ollerton, J. (2006). "Biological barter": patterns of specialization compared across different  
724 mutualisms. In: *Plant-pollinator interactions: from specialization to generalization*  
(eds. Waser, N.M. & Ollerton, J.). University of Chicago Press, Chicago, pp. 411–  
726 435.
- Ortiz-Pulido, R., Albores-Barajas, Y.V. & Díaz, S.A. (2007). Fruit removal efficiency and  
728 success: influence of crop size in a neotropical treelet. *Plant Ecol.*, 189, 147–154.
- Palacio, F.X. (2019). Seed dispersal effectiveness by frugivorous birds: Identifying functional  
730 equivalent species in bird assemblages. *Avian Biol. Res.*, 12, 103–108.
- Perea, R., Delibes, M., Polko, M., Suárez-Esteban, A. & Fedriani, J.M. (2013). Context-  
732 dependent fruit–frugivore interactions: partner identities and spatio-temporal  
variations. *Oikos*, 122, 943–951.
- 734 Piper, J.K. (1986). Germination and Growth of Bird-Dispersed Plants: Effects of Seed Size  
and Light on Seedling Vigor and Biomass Allocation. *Am. J. Bot.*, 73, 959–965.
- 736 Quintero, E., Isla, J. & Jordano, P. (2021). Methodological overview and data-merging  
approaches in the study of plant–frugivore interactions. *Oikos*, oik.08379.
- 738 Reid, N. (1990). Mutualistic interdependence between mistletoes (*Amyema quandang*), and  
spiny-cheeked honeyeaters and mistletoebirds in an arid woodland. *Austral Ecol.*, 15,

- 740           175–190.
- Rooney, N., McCann, K., Gellner, G. & Moore, J.C. (2006). Structural asymmetry and the  
742           stability of diverse food webs. *Nature*, 442, 265–269.
- Sachs, J.L. & Simms, E.L. (2006). Pathways to mutualism breakdown. *Trends Ecol. Evol.*,  
744           21, 585–592.
- Sallabanks, R. (1993). Hierarchical Mechanisms of Fruit Selection by an Avian Frugivore.  
746           *Ecology*, 74, 1326–1336.
- Schupp, E.W. (1993). Quantity, quality and the effectiveness of seed dispersal by animals.  
748           In: *Frugivory and seed dispersal: ecological and evolutionary aspects* (eds. Fleming,  
              T.H. & Estrada, A.). Springer Netherlands, Dordrecht, pp. 15–29.
- 750   Schupp, E.W., Jordano, P. & Gómez, J.M. (2017). A general framework for effectiveness  
              concepts in mutualisms. *Ecol. Lett.*, 20, 577–590.
- 752   Schupp, E.W., Zwolak, R., Jones, L.R., Snell, R.S., Beckman, N.G., Aslan, C., *et al.* (2019).  
              Intrinsic and extrinsic drivers of intraspecific variation in seed dispersal are diverse  
754           and pervasive. *AoB PLANTS*, 11, plz067.
- Stan Development Team. (2022). *Stan Modeling Language Users Guide and Reference*  
756           *Manual, v. 2.29* <https://mc-stan.org>.
- Thompson, J.N. (2009). The Coevolving Web of Life(American Society of Naturalists  
758           Presidential Address). *Am. Nat.*, 173, 125–140.
- Tonos, J., Razafindratsima, O.H., Fenosoa, Z.S.E. & Dunham, A.E. (2021). Individual-based  
760           networks reveal the highly skewed interactions of a frugivore mutualist with individual  
              plants in a diverse community. *Oikos*, oik.08539.
- 762   Vázquez, D.P., Melián, C.J., Williams, N.M., Blüthgen, N., Krasnov, B.R. & Poulin, R. (2007).  
              Species abundance and asymmetric interaction strength in ecological networks.  
764           *Oikos*, 116, 1120–1127.
- Vázquez, D.P., Morris, W.F. & Jordano, P. (2005). Interaction frequency as a surrogate for

- 766 the total effect of animal mutualists on plants: Total effect of animal mutualists on  
plants. *Ecol. Lett.*, 8, 1088–1094.
- 768 Weiner, J. & Solbrig, O.T. (1984). The meaning and measurement of size hierarchies in  
plant populations. *Oecologia*, 61, 334–336.
- 770 Weinstein, B.G. (2018). Scene-specific convolutional neural networks for video-based  
biodiversity detection. *Methods Ecol. Evol.*, 9, 1435–1441.
- 772 Wheelwright, N.T. & Orians, G.H. (1982). Seed Dispersal by Animals: Contrasts with Pollen  
Dispersal, Problems of Terminology, and Constraints on Coevolution. *Am. Nat.*, 119,  
774 402–413.
- Whitham, T.G., Bailey, J.K., Schweitzer, J.A., Shuster, S.M., Bangert, R.K., LeRoy, C.J., *et*  
776 *al.* (2006). A framework for community and ecosystem genetics: from genes to  
ecosystems. *Nat. Rev. Genet.*, 7, 510–523.
- 778 Wootton, K.L. & Stouffer, D.B. (2016). Many weak interactions and few strong; food-web  
feasibility depends on the combination of the strength of species 'interactions and  
780 their correct arrangement. *Theor. Ecol.*, 9, 185–195.
- Zamora, R. (2000). Functional equivalence in plant-animal interactions: ecological and  
782 evolutionary consequences. *Oikos*, 88, 442–447.



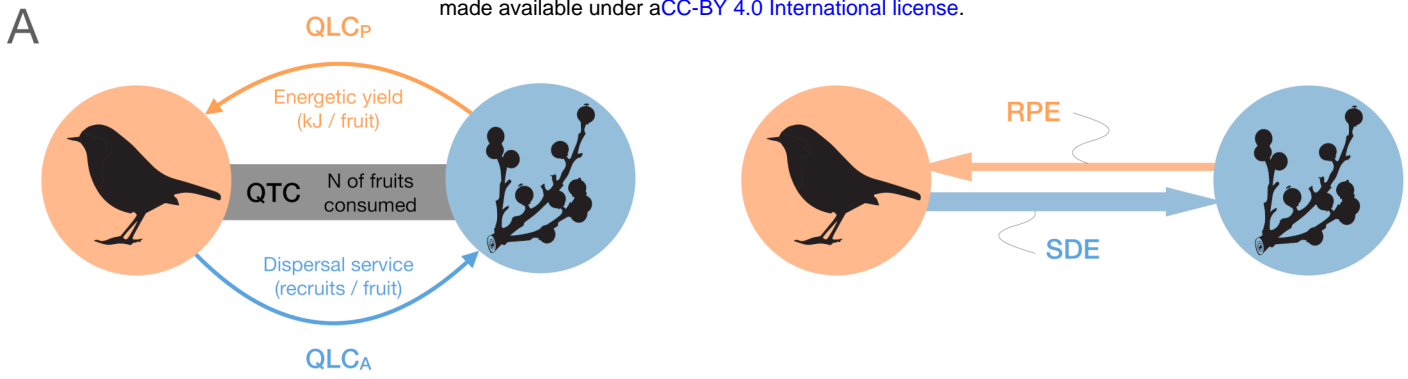

**B**

|      |    | QTC |    | QLCP |
|------|----|-----|----|------|
|      |    | A1  | A2 |      |
| QTC  | P1 | 5   | 8  | 1    |
|      | P2 | 4   | 6  | 1.2  |
|      | P3 | 0   | 3  | 1.3  |
|      | P4 | 1   | 0  | 0.9  |
| QLCA |    | 0.5 | 1  |      |

**RPE** (Resource Provisioning Effectiveness) =  
 N of fruits consumed (QTC) \* **Energetic yield (QLCP)**

**SDE** (Seed Dispersal Effectiveness) =  
 N of fruits consumed (QTC) \* **Dispersal service (QLCA)**

**C**

|    | RPE |     | SDE |    |
|----|-----|-----|-----|----|
|    | A1  | A2  | A1  | A2 |
| P1 | 5   | 8   | 2.5 | 8  |
| P2 | 4.8 | 7.2 | 2   | 6  |
| P3 | 0   | 3.9 | 0   | 3  |
| P4 | 0.9 | 0   | 0.5 | 0  |

**E**

|    | DEPENDENCE |      | ASYMMETRY |      |
|----|------------|------|-----------|------|
|    | A1         | A2   | A1        | A2   |
| P1 | 0.47       | 0.42 | -0.49     | 0.45 |
| P2 | 0.45       | 0.38 | -0.44     | 0.50 |
| P3 | 0          | 0.20 |           | 0.80 |
| P4 | 0.08       | 0    | 0.92      |      |

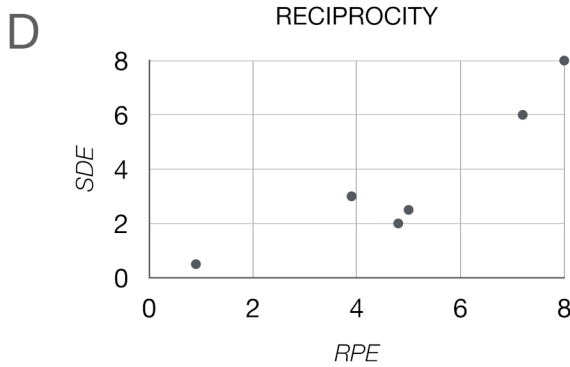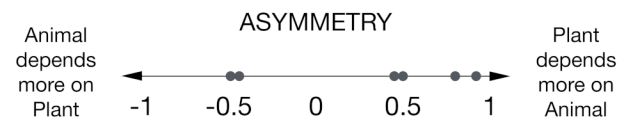

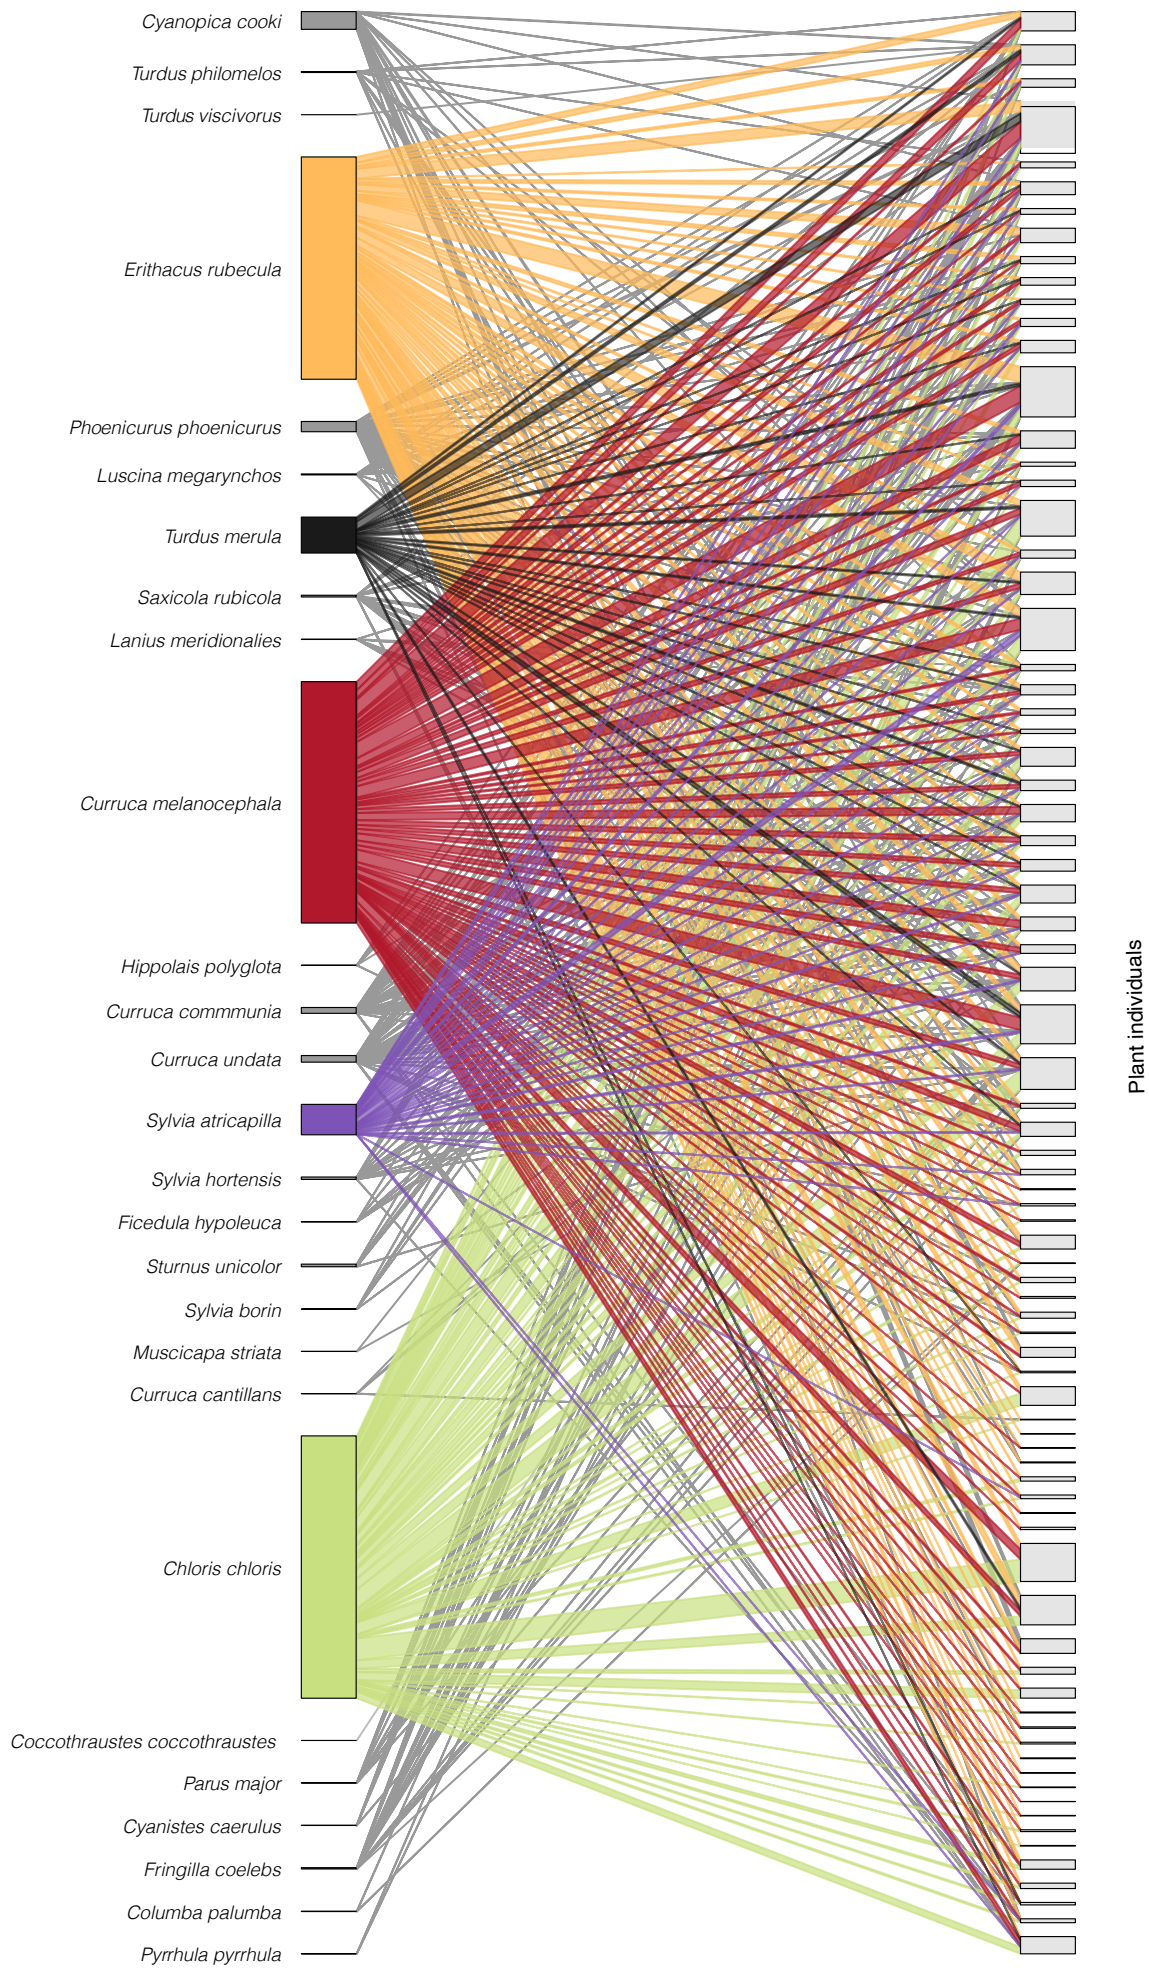

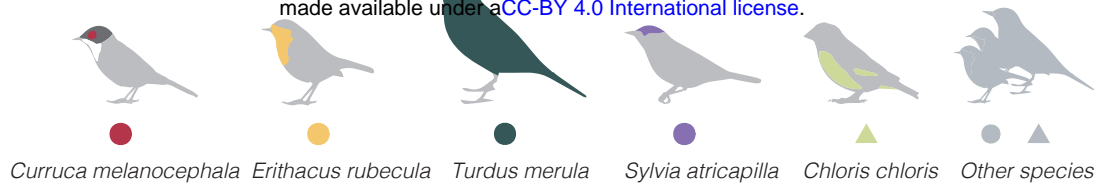

### Resource Provisioning Effectiveness - RPE

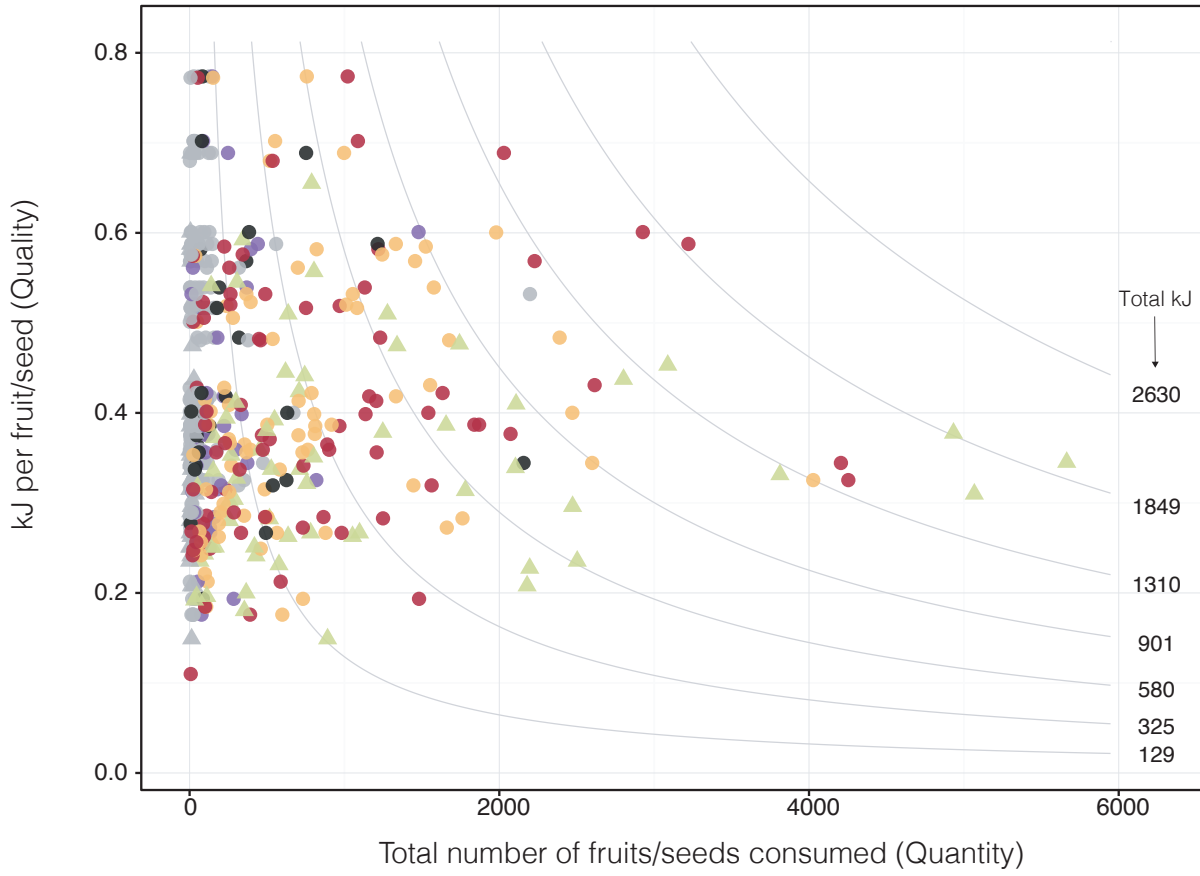

### Seed Dispersal Effectiveness - SDE

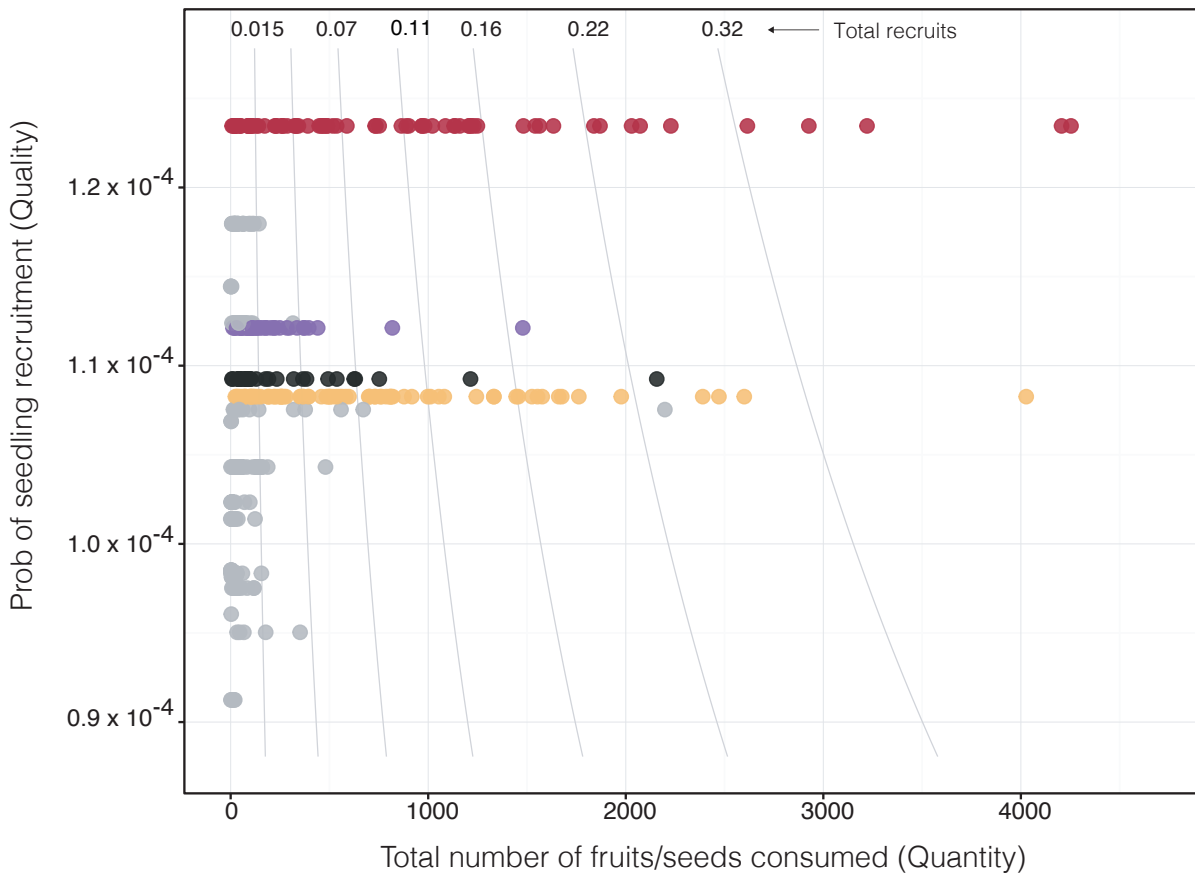

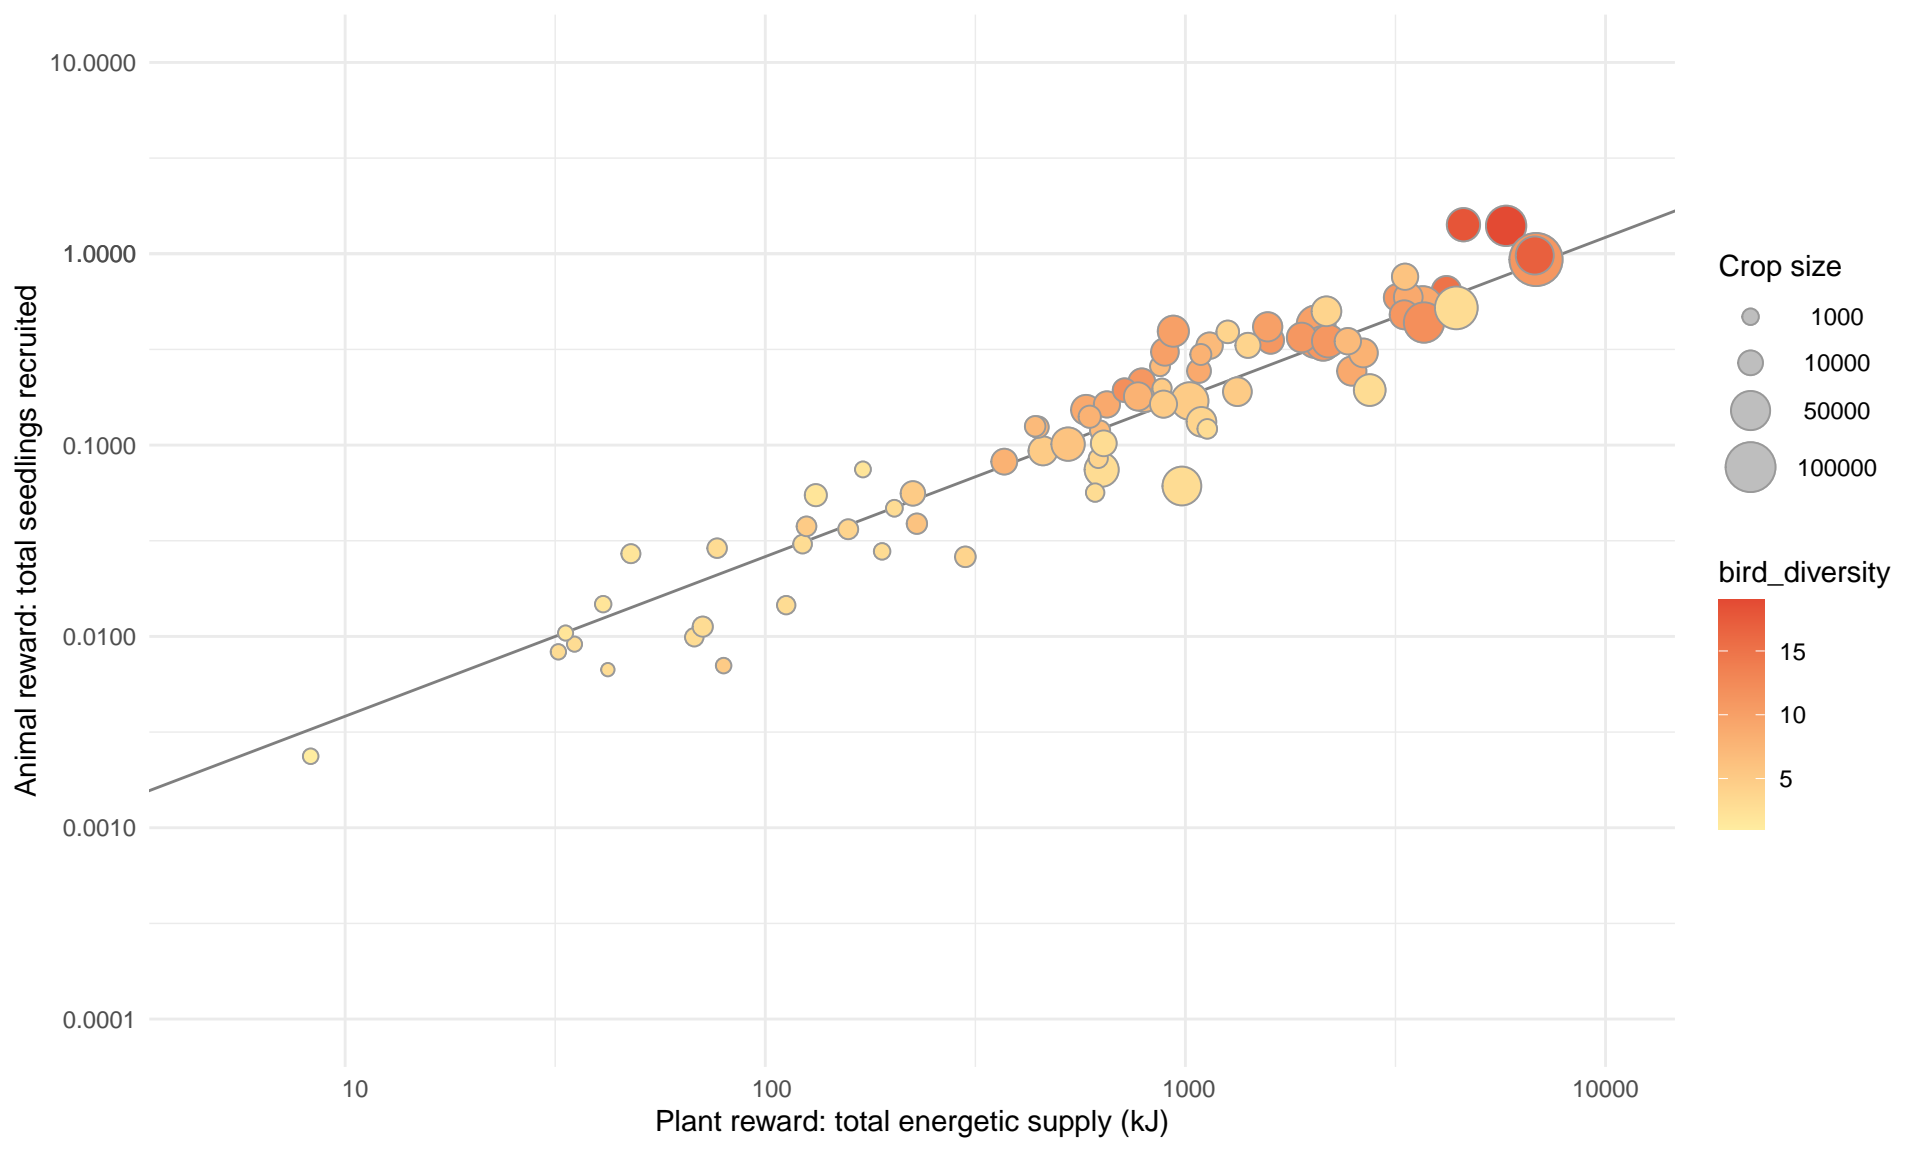

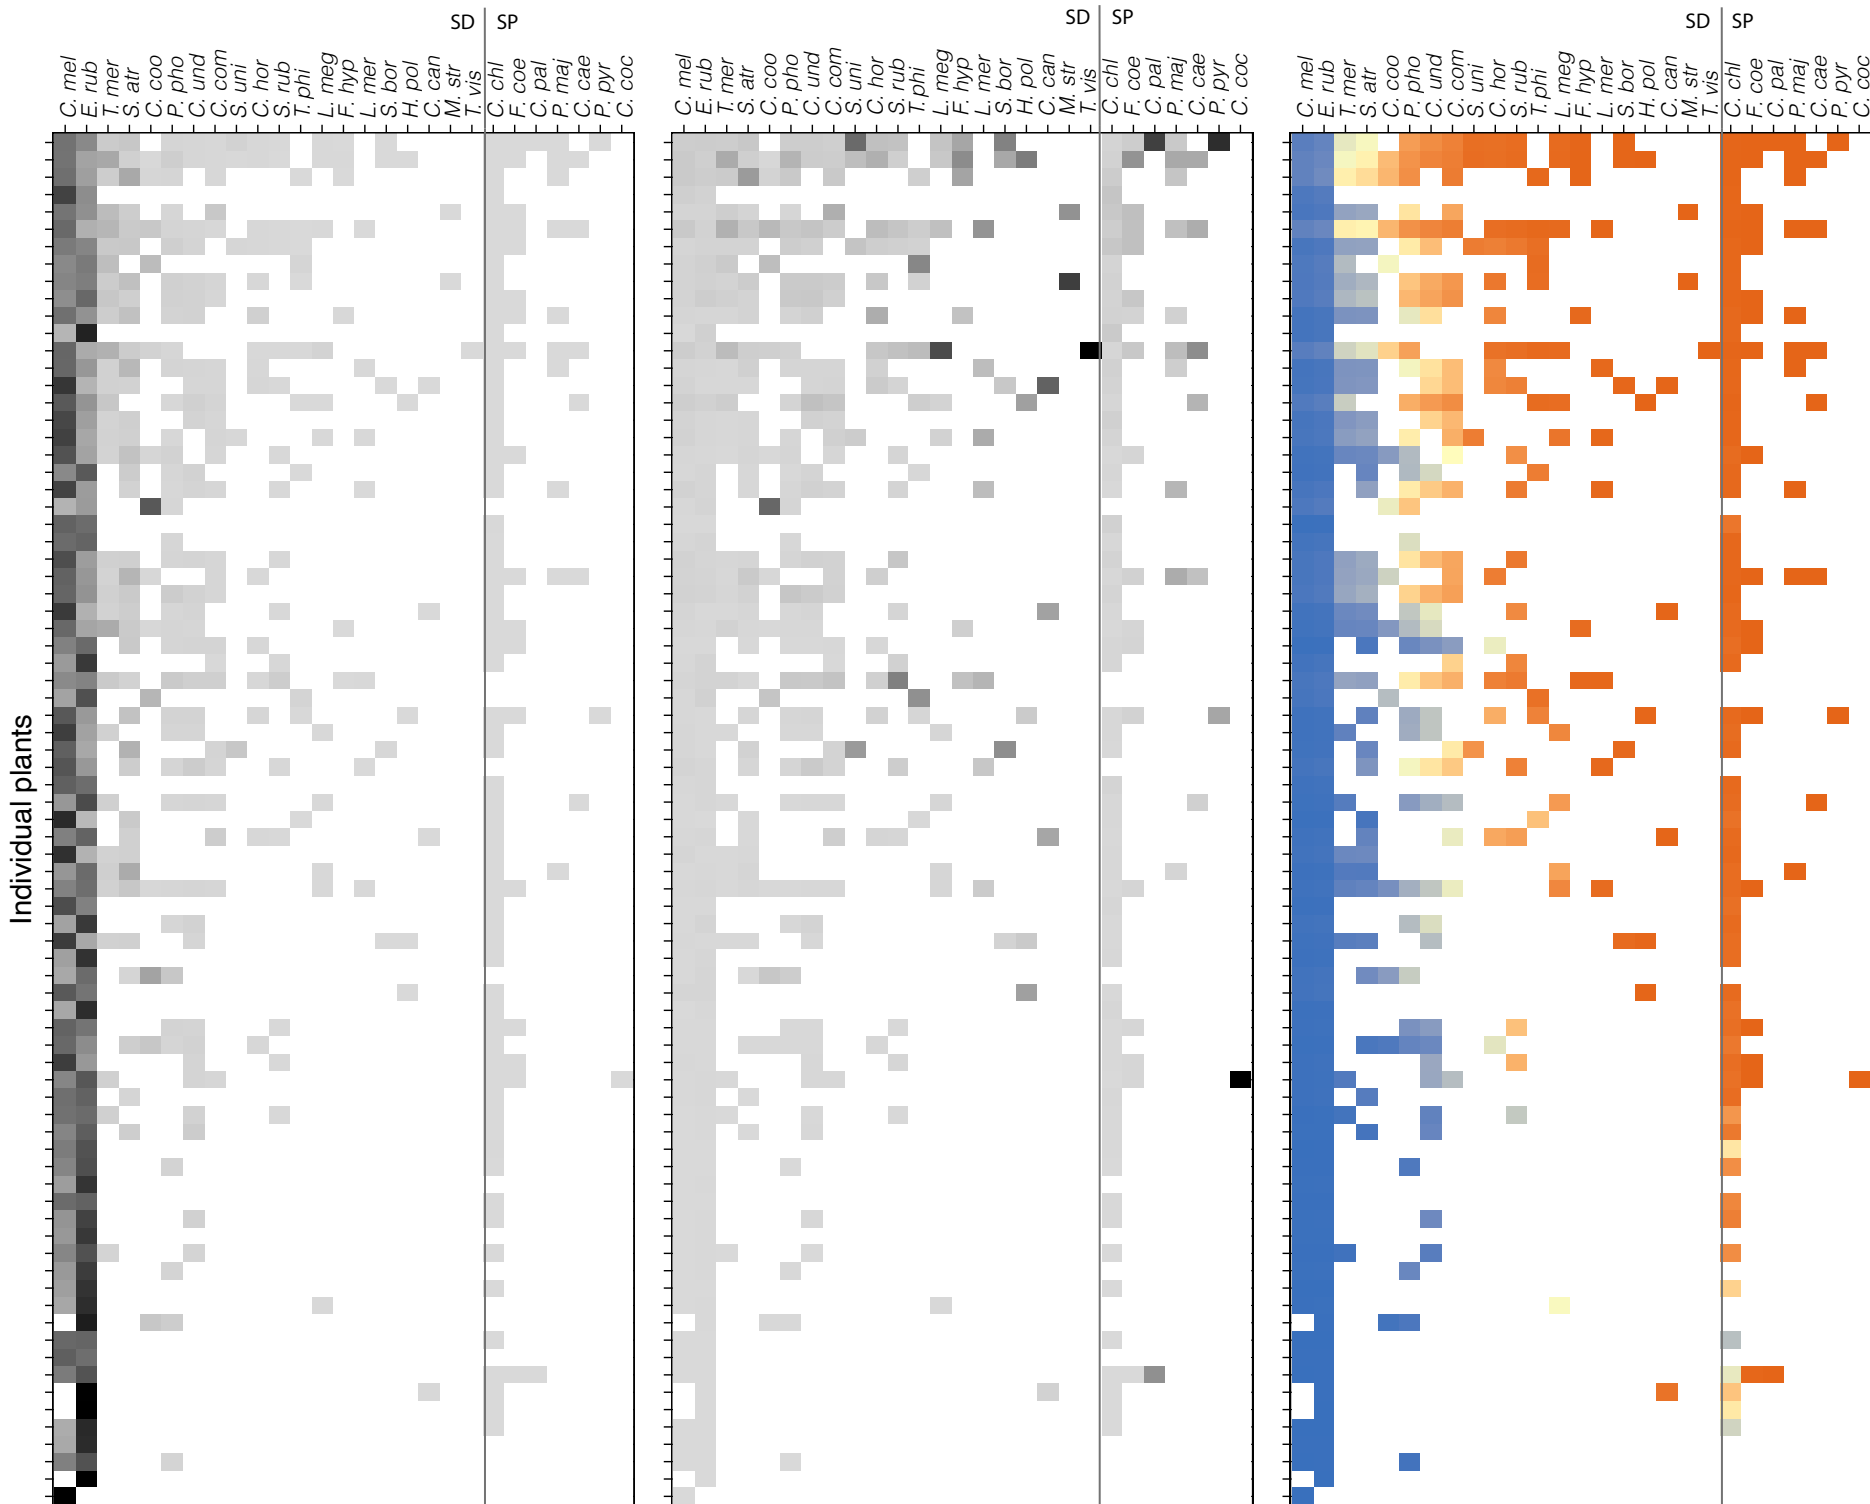

0.00 0.25 0.50 0.75 1.00

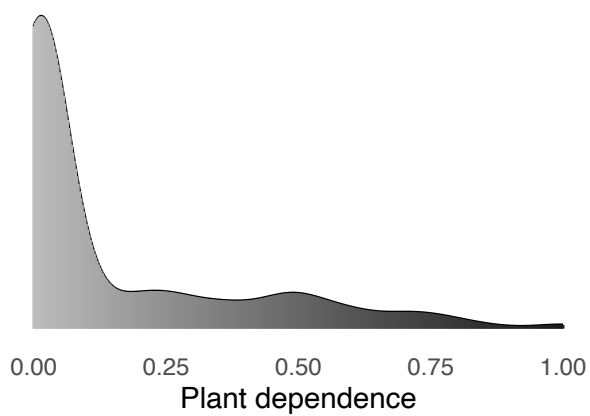

0.00 0.25 0.50 0.75 1.00

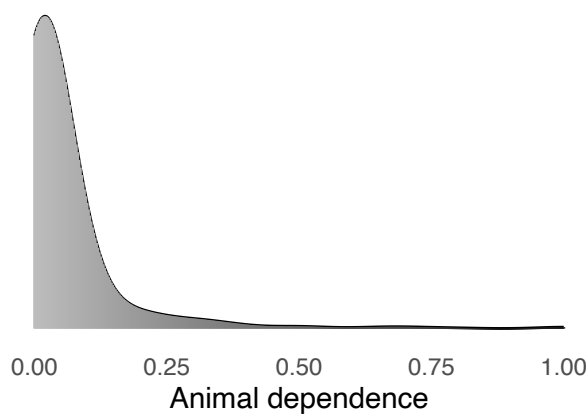

-1.0 -0.5 0.0 0.5 1.00

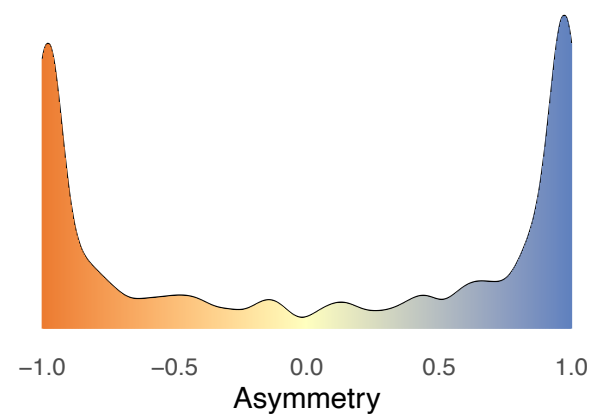

Source: https://www.biorxiv.org/content/10.1101/2022.03.23.485462v1.full.pdf
